# Supplementary material for: Life cycle optimisation tool development for process systems and centralised supply chain design
Source: Royal Society of Chemistry journal article supplement (doi:10.1039/d3su00251a), 2023-01-01
Supplement: d3su00251a1.pdf [file d3su00251a1.pdf]

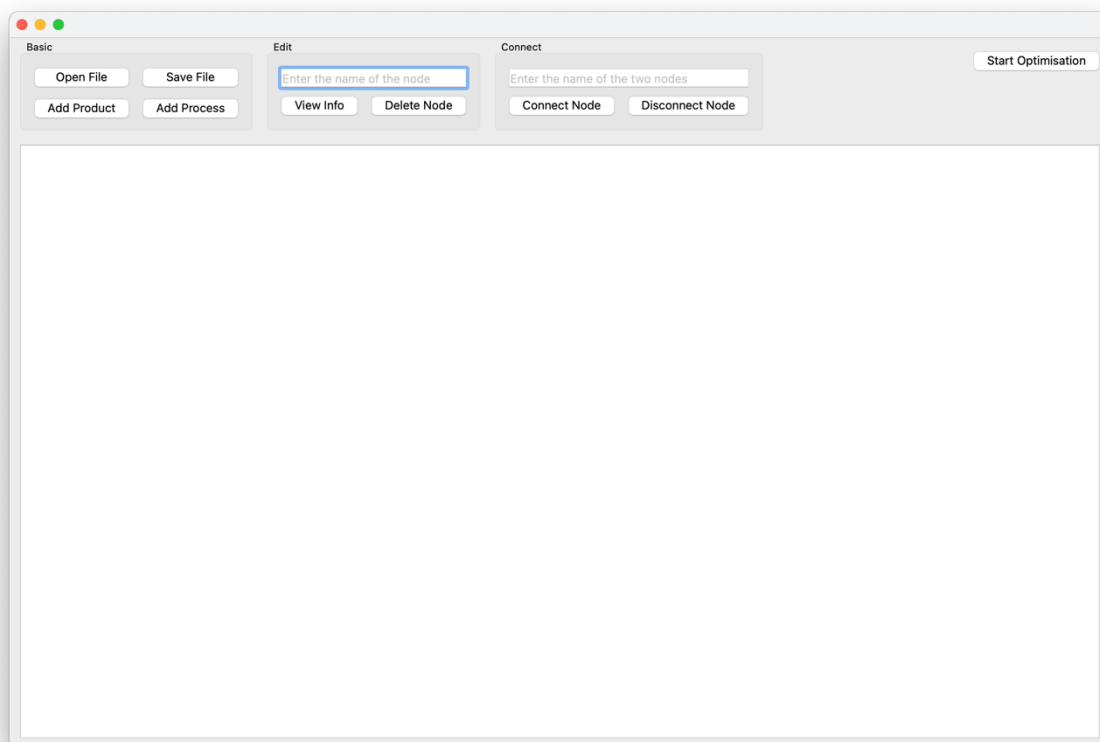

Figure S-1 Main window of the software

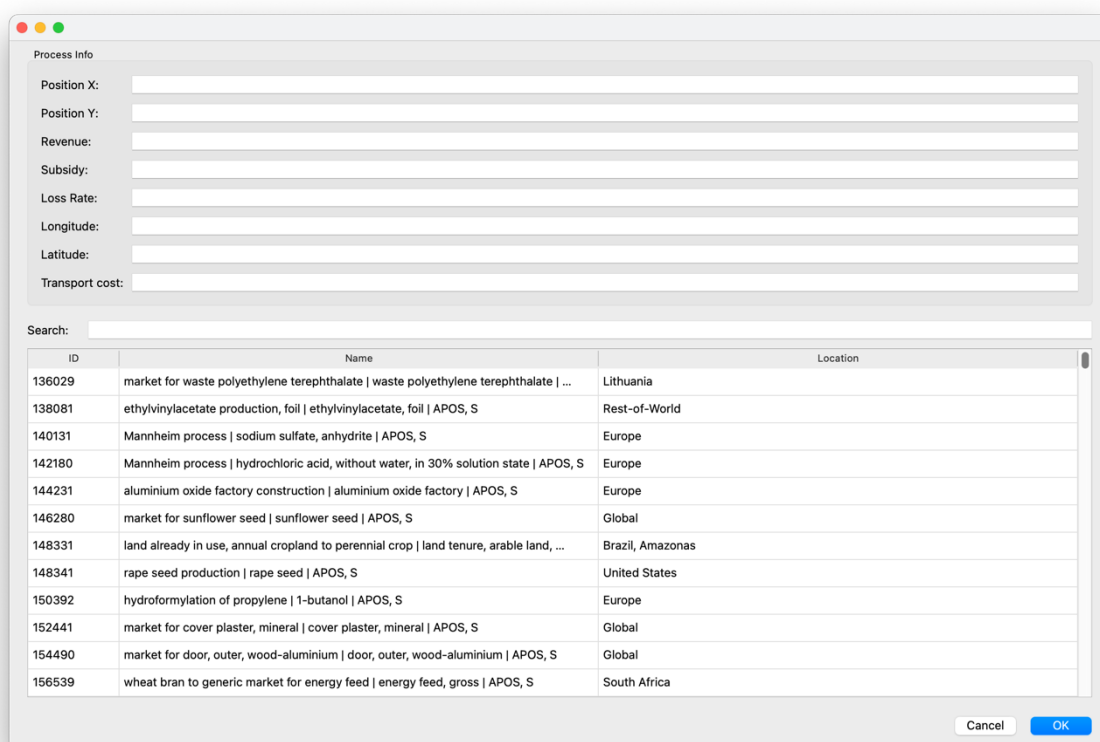

Figure S-2 Process window of the software

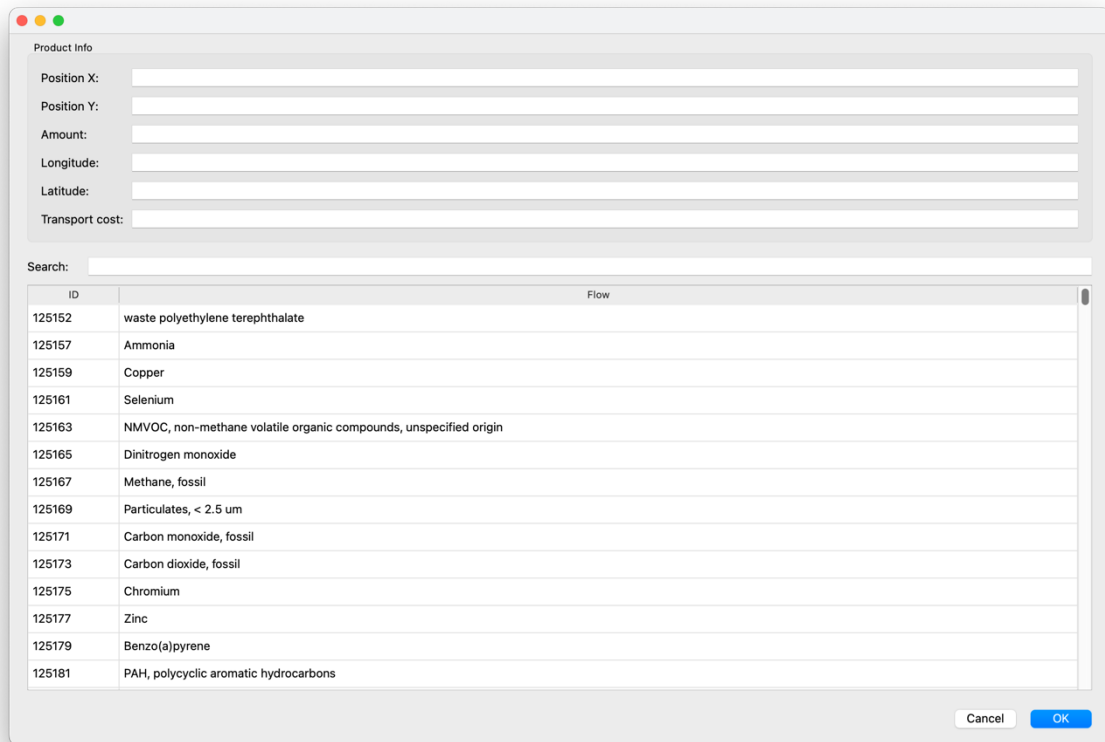

Figure S-3 Product window of the software

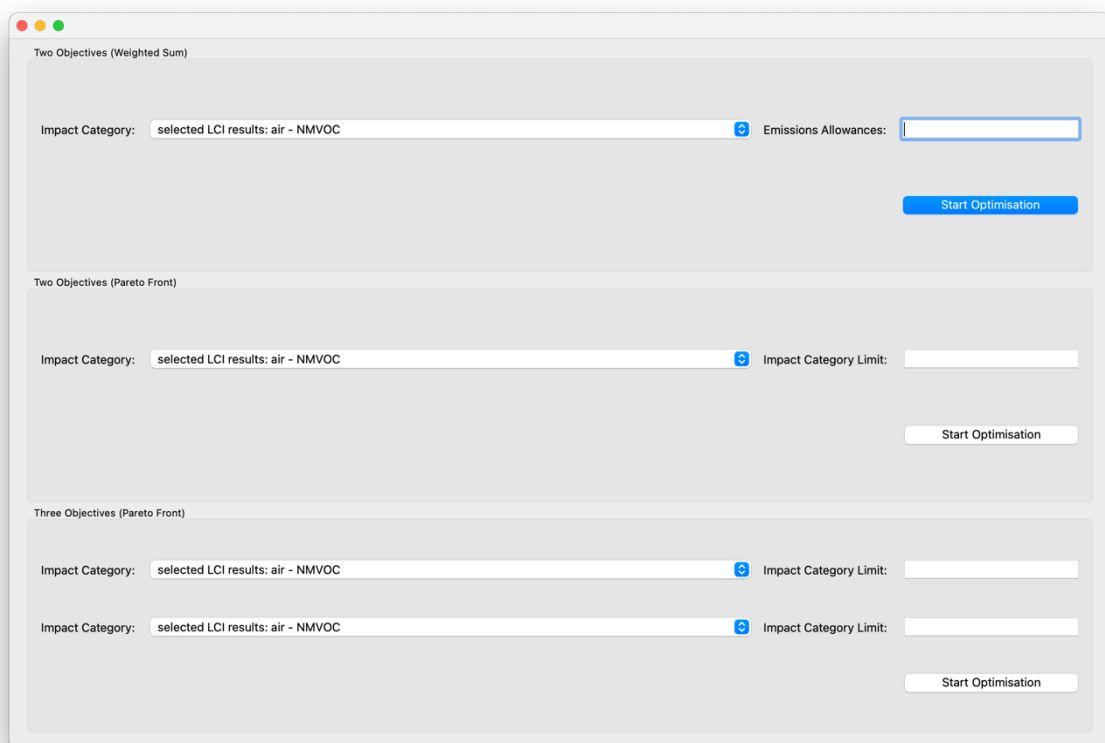

Figure S-4 Optimisation window of the software

Impact of natural gas price on electricity generation (case study 2)

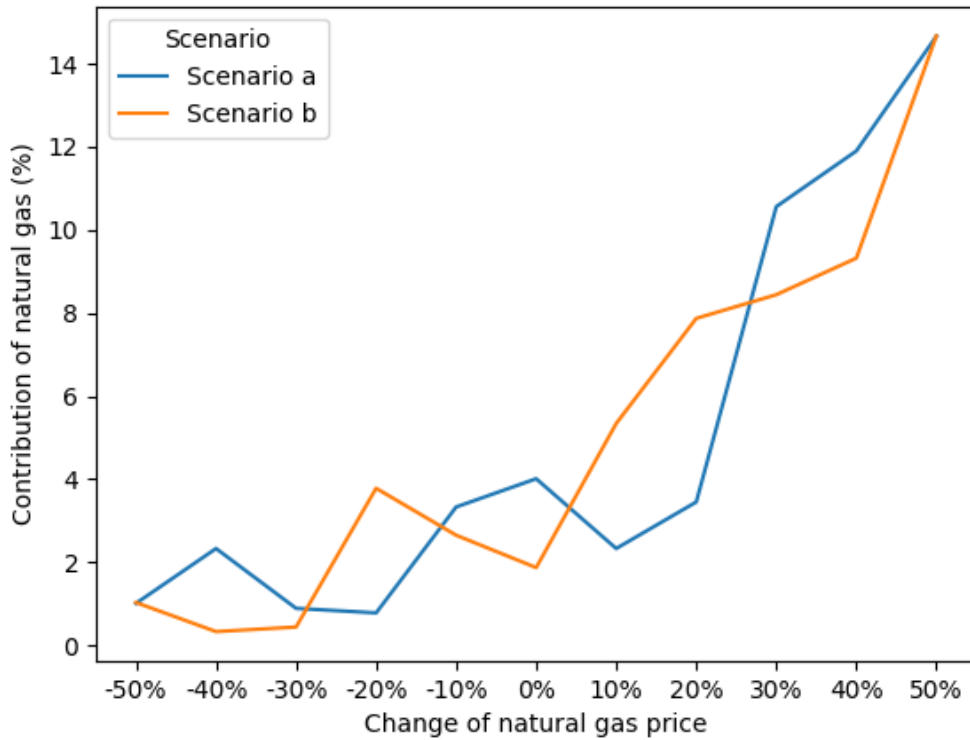

Figure S-5 Impact of natural gas price on electricity generation (case study 2)

Impact of natural gas price on electricity generation (case study 3)

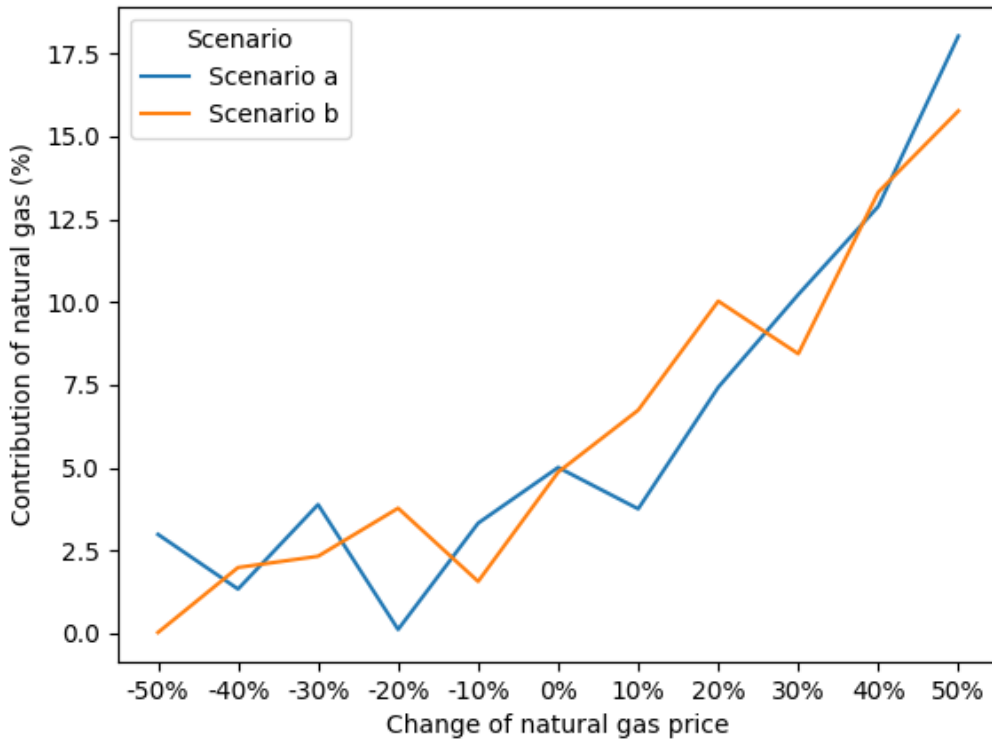

Figure S-6 Impact of natural gas price on electricity generation (case study 3)
